# Supplementary material for: 3D Cellular Architecture Affects MicroRNA and Protein Cargo of Extracellular Vesicles
Source: PubMed Central journal article supplement (PMC6382357; doi:10.1002/advs.201800948), 2018-12-20
Supplement: ADVS-6-1800948-s001.pdf [file ADVS-6-1800948-s001.pdf]

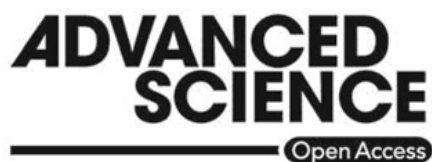

## Supporting Information

for *Adv. Sci.*, DOI: 10.1002/advs.201800948

### 3D Cellular Architecture Affects MicroRNA and Protein Cargo of Extracellular Vesicles

*Sara Rocha, Joana Carvalho, Patrícia Oliveira, Maren Voglstaetter, Domitille Schvartz, Andreas R. Thomsen, Nadia Walter, Richa Khanduri, Jean-Charles Sanchez, Andreas Keller, Carla Oliveira,\* and Irina Nazarenko\**

## Supplementary Figures

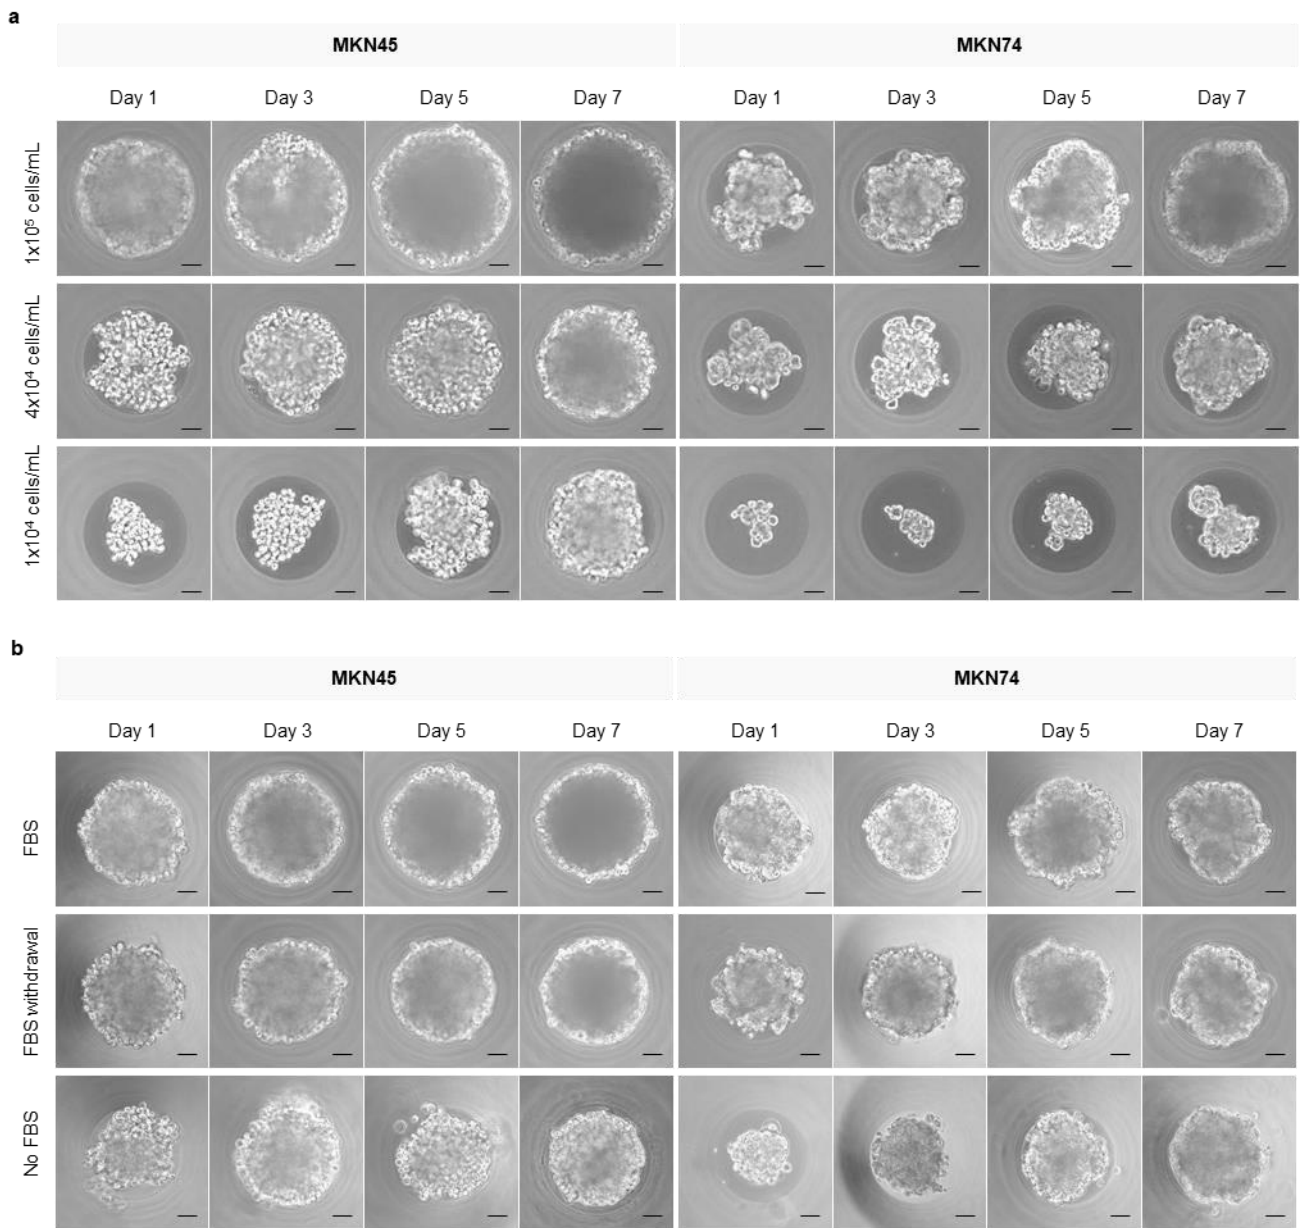

**Supplementary Figure 1. Optimization of the 3D culture model. (a)** Representative microscope images of aggregates obtained using different cell seeding densities. Cell seeding at a density of  $1 \times 10^5$  cells/mL ( $1 \times 10^6$  cells per agarose array) enables the establishment of larger aggregates ( $\sim 200 \mu\text{m}$ ). **(b)** Representative microscope images of aggregates cultured with distinct FBS supplementations. FBS seems to accelerate aggregates growth, particularly during the first hours in culture. Scale bars,  $50 \mu\text{m}$ .

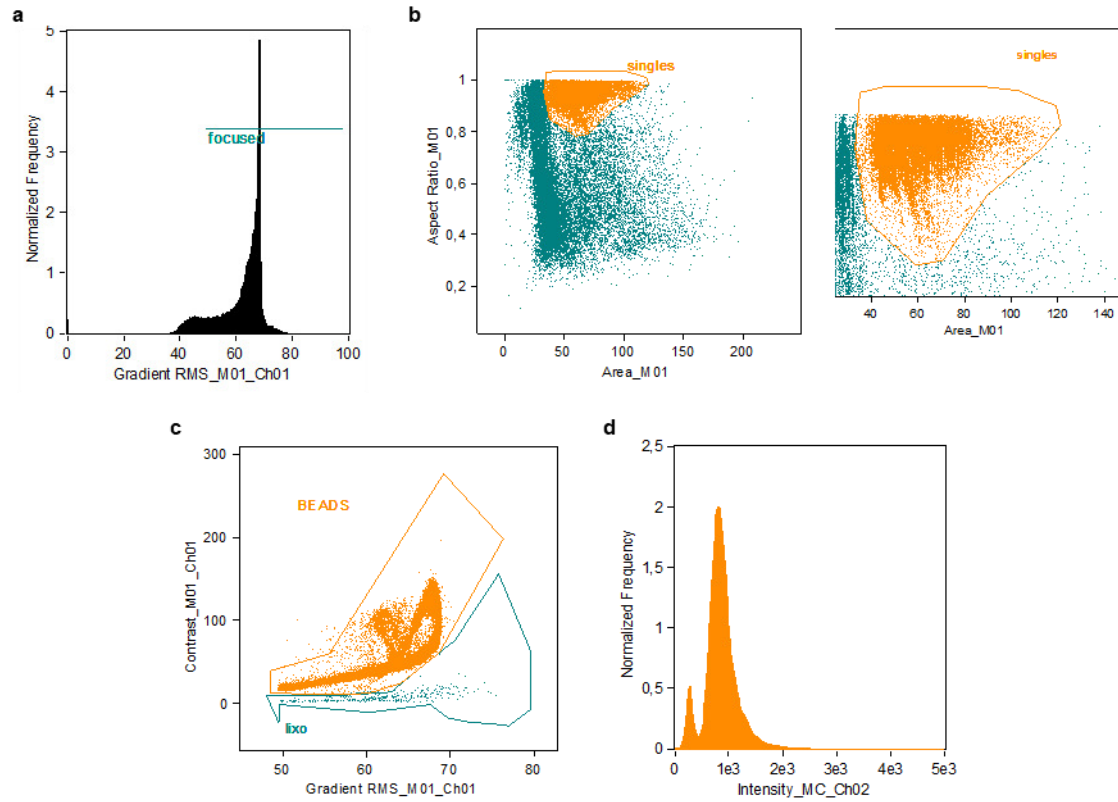

**Supplementary Figure 2. Step-wise imaging flow cytometry analysis of EVs-coupled to beads.** (a) Focused beads were gated using a histogram of gradient RMS, which represents the Root Mean Square for image sharpness. (b) An aspect ratio/area scatter plot was used to select single beads based on their roundness (aspect ratio close to 1) and characteristic area (40-120 pixels). (c) A contrast/gradient RMS plot was used to distinguish beads from debris, which showed small changes of pixel values (contrast near 0). (d) The intensity of the fluorescence staining (Alexa Fluor 488) was plotted in a histogram of channel 2 intensity.

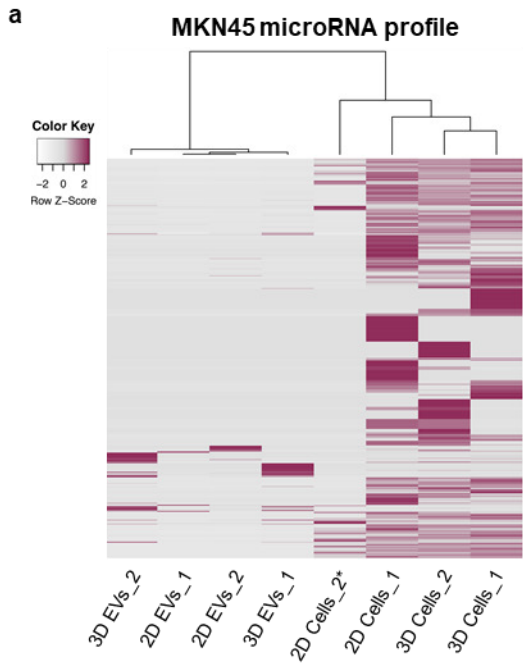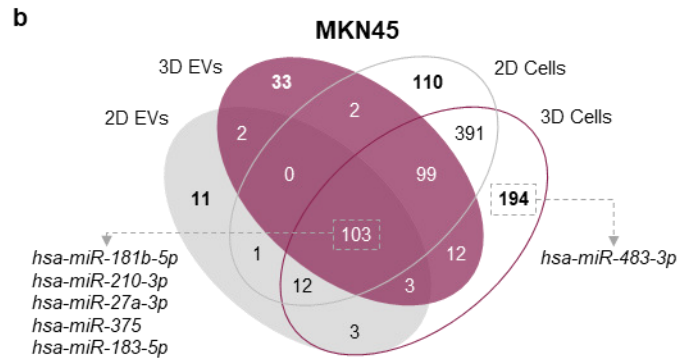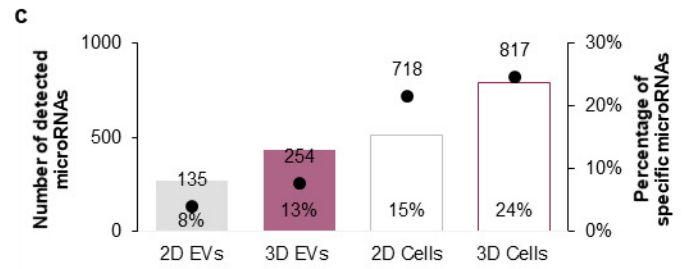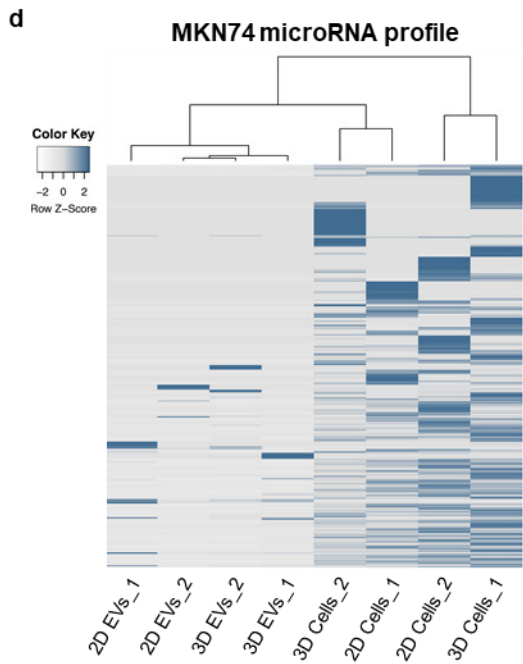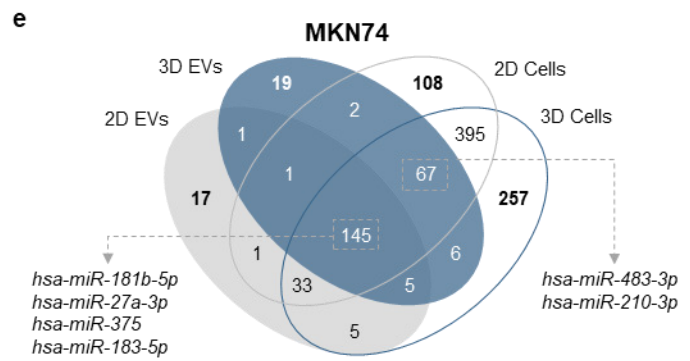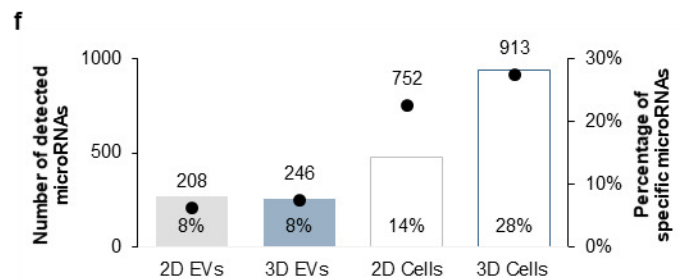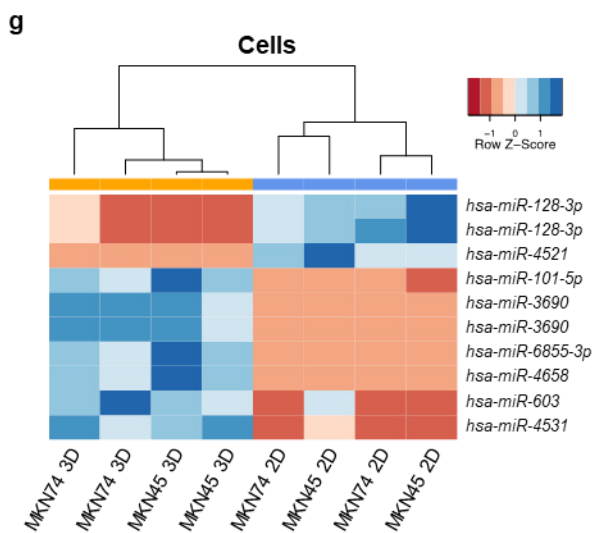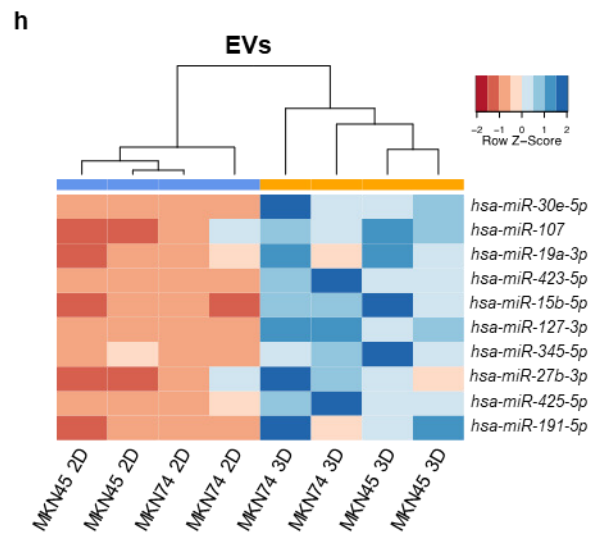

**Supplementary Figure 3. Individual analysis of microRNA repertoires of MKN45 (a-c) and MKN74 (d-f) cells and EVs.** (a, d) Heatmap and dendrogram of microRNA profiles of GC EVs and cells in 2D and 3D cultures (Z-score normalized expression values). (b, e) Venn diagrams showing the distribution of detected microRNAs. (c, f) Plots showing the number of total microRNAs and percentage of specific microRNAs detected in each condition (2 biological replicates). (g, h) The top-10 microRNAs in cells (g) and EVs (h) identified by supervised hierarchical clustering according to un-paired t-tests, and subjected to transformation of the normalized expression intensities to z-scores.

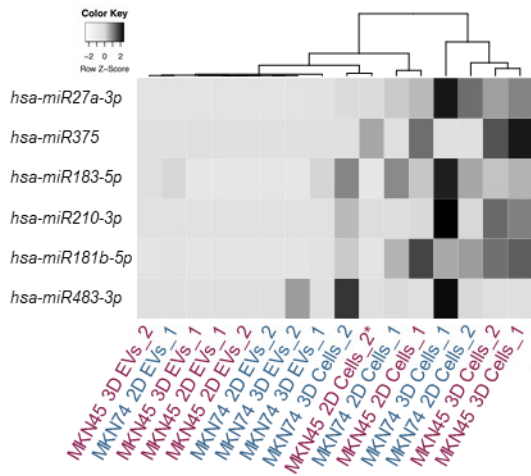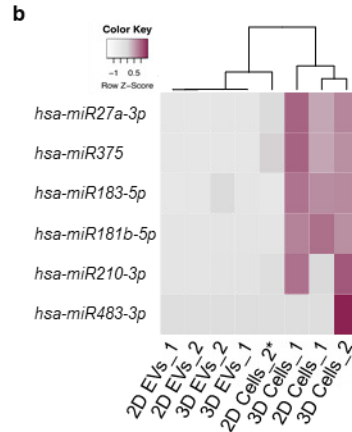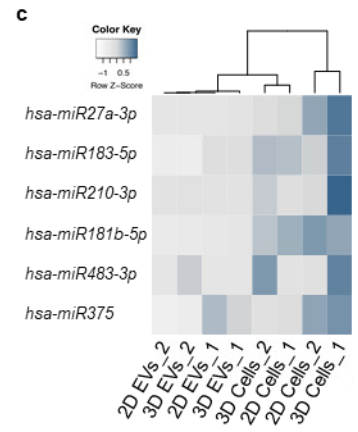

**d**

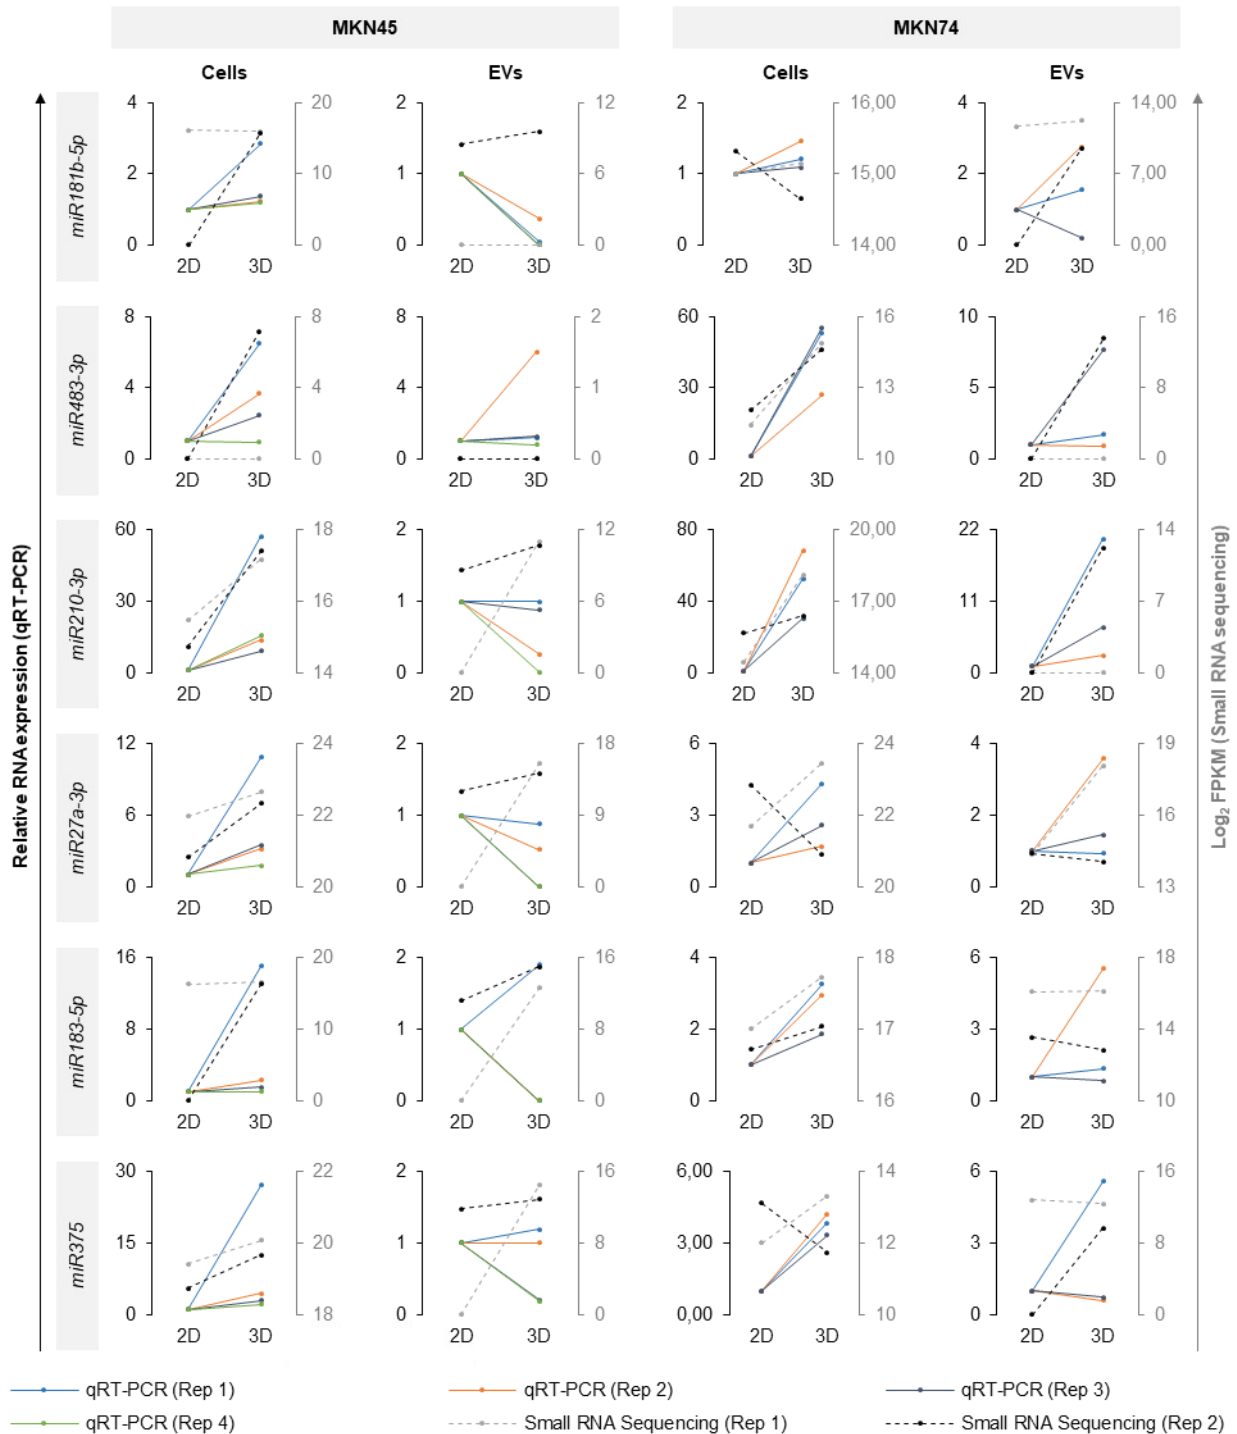

**Supplementary Figure 4. Validation of the small RNA sequencing data by quantitative real-time PCR. (a-c)** Heatmap and dendrogram of six microRNAs detected in MKN45 and MKN74 EVs and cells in 2D and 3D cultures (Z-score normalized expression values). Analysis performed with data for both MKN45 and MKN74 GC cell lines **(a)**, and individually for MKN45 **(b)** or MKN74 **(c)**. **(d)** Quantitative RT-PCR and small RNA sequencing data of the six microRNAs from MKN45 and MKN74 cells and EVs selected for validation. Each biological replicate is independently represented.

|                    |                    |          |           |                                                                                    |          |             |     |                                                                                                                                                                                           |
|--------------------|--------------------|----------|-----------|------------------------------------------------------------------------------------|----------|-------------|-----|-------------------------------------------------------------------------------------------------------------------------------------------------------------------------------------------|
| Pathways (miRWalk) | hsa04115 pathway   | p53      | signaling | 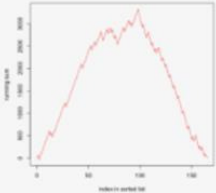  | enriched | 1.90629e-10 | 100 | hsa-miR-181a-5p; hsa-miR-30b-5p; hsa-let-7b-5p; hsa-miR-23a-3p; hsa-miR-21-5p; hsa-miR-200c-3p; hsa-miR-27a-3p; hsa-miR-30d-5p; hsa-miR-34a-5p; hsa-miR-191-5p; hsa-miR-125a-5p; hsa-     |
| Pathways (miRWalk) | WP382 pathway      | MAPK     | signaling |   | enriched | 8.44947e-10 | 105 | hsa-miR-181a-5p; hsa-miR-223-3p; hsa-miR-30b-5p; hsa-let-7b-5p; hsa-miR-23a-3p; hsa-miR-21-5p; hsa-miR-200c-3p; hsa-miR-27a-3p; hsa-miR-30d-5p; hsa-miR-34a-5p; hsa-miR-191-5p; hsa-miR-  |
| Pathways (miRWalk) | WP366 Pathway1     | TGF beta | Signaling |   | enriched | 1.78309e-07 | 108 | hsa-miR-181a-5p; hsa-miR-223-3p; hsa-miR-30b-5p; hsa-let-7b-5p; hsa-miR-23a-3p; hsa-miR-21-5p; hsa-miR-200c-3p; hsa-miR-27a-3p; hsa-miR-30d-5p; hsa-miR-34a-5p; hsa-miR-125a-5p; hsa-     |
| Pathways (miRWalk) | P04393 Ras Pathway |          |           |  | enriched | 2.51788e-07 | 80  | hsa-miR-181a-5p; hsa-miR-223-3p; hsa-miR-30b-5p; hsa-let-7b-5p; hsa-miR-21-5p; hsa-miR-200c-3p; hsa-miR-30d-5p; hsa-miR-34a-5p; hsa-miR-191-5p; hsa-miR-125a-5p; hsa-miR-221-3p; hsa-miR- |

**Supplementary Figure 5. GSEA analysis results.** GSEA analysis of 164 microRNAs detected in EVs from 3D culture, showing pathways highly enriched in 3D EVs.



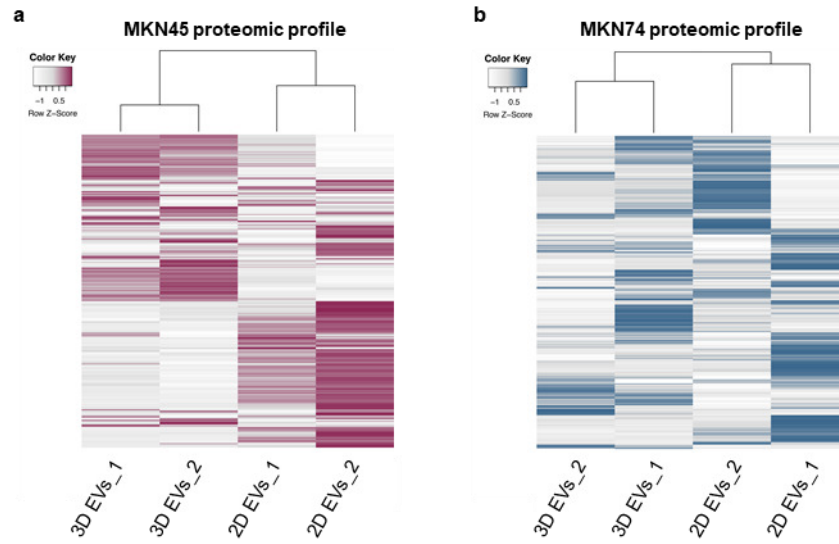

**Supplementary Figure 6. Protein expression profiles of EVs isolated from 2D and 3D cultures.** Heatmap and dendrogram of proteins detected individually in MKN45 (**a**) and MKN74 (**b**) EVs isolated from 2D and 3D cultures (Z-score normalized expression values).

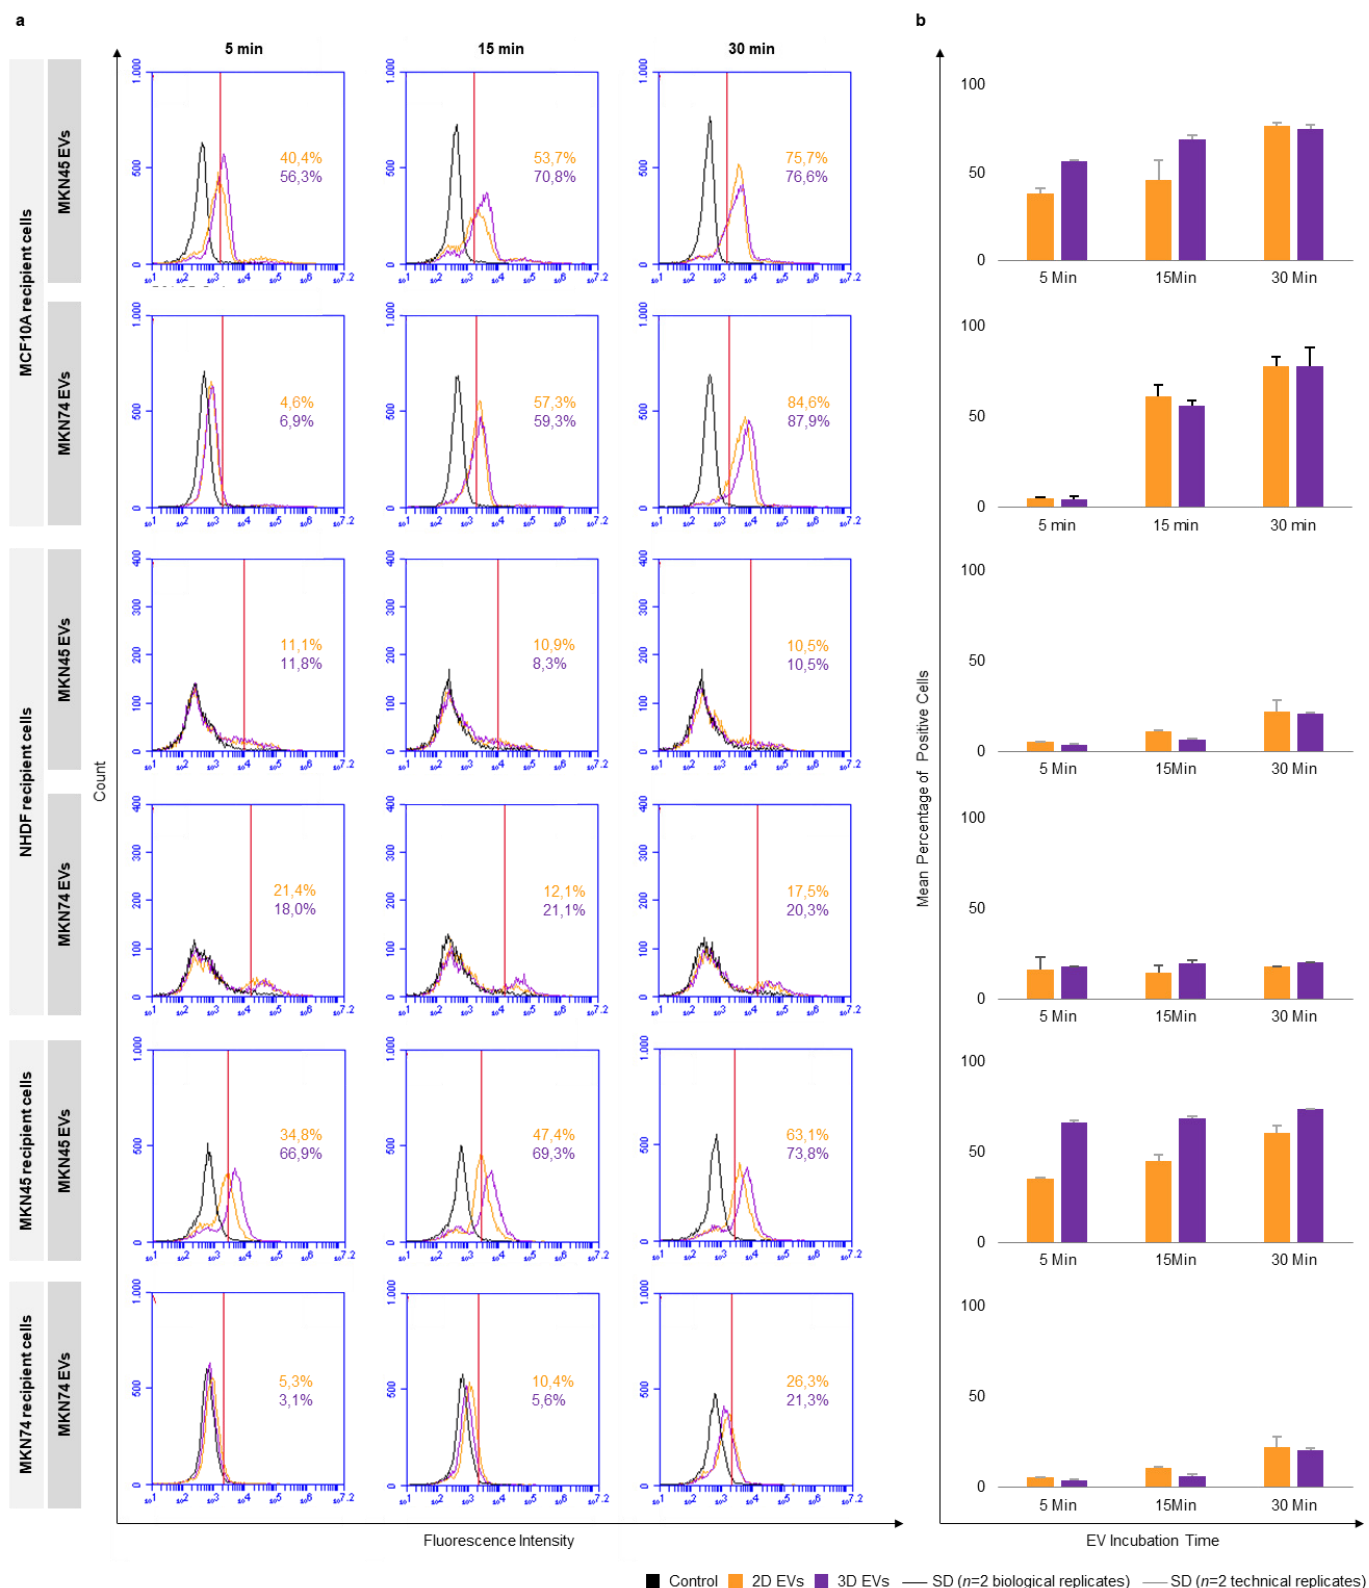

**Supplementary Figure 7. Association between cells and EVs isolated from 2D and 3D cultures.** Representative histograms showing the fluorescence intensity of EVs associated with different recipient cells (MCF10A, NHDF, MKN45 and MKN74 cells). Black curves for the control, orange curves for association with 2D EVs and purple for association with 3D EVs (a). Graphs showing the mean percentage of positive cells, i.e. cells that are associated with fluorescently labelled EVs (b).

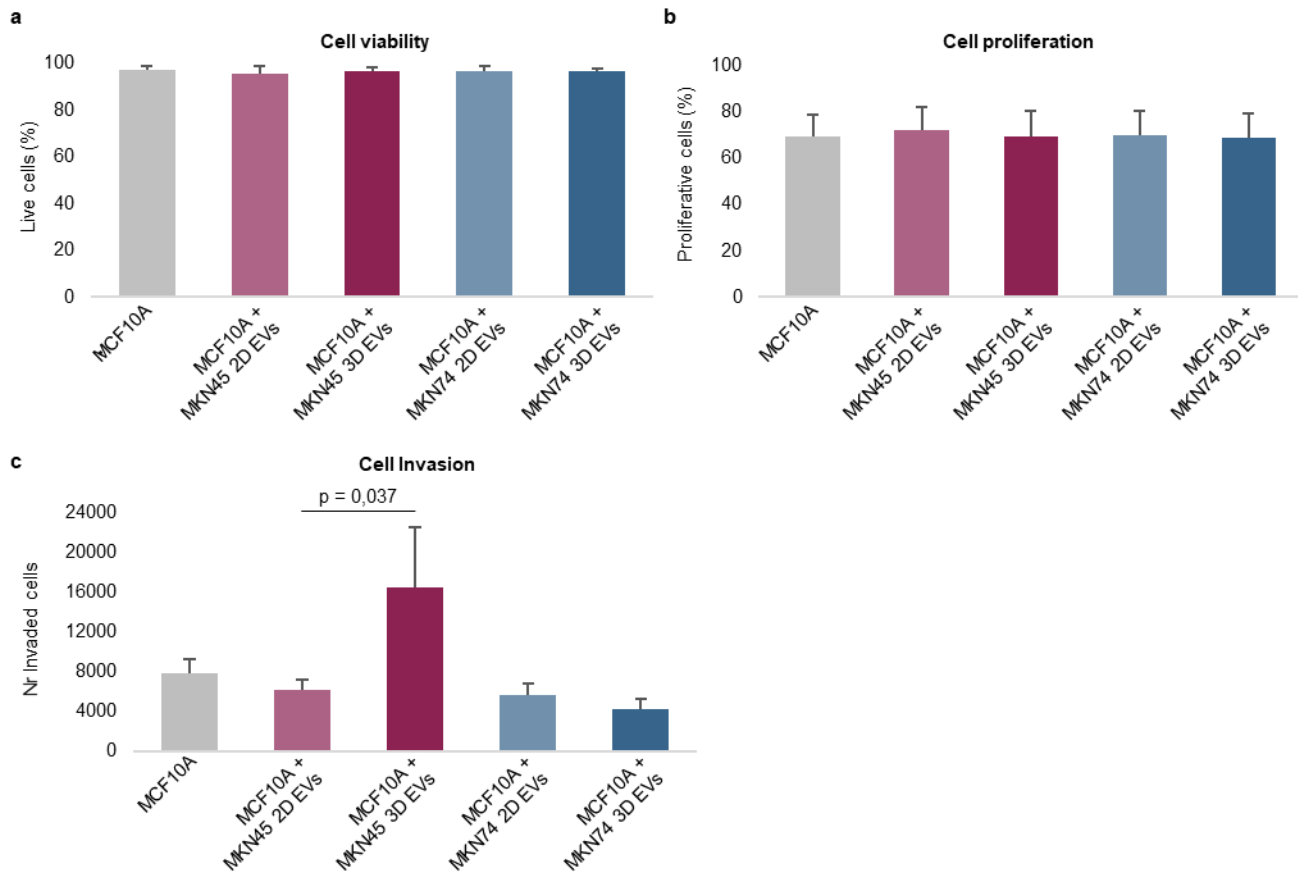

**Supplementary Figure 8. Functional impact of EVs isolated from 2D and 3D cultures.** Graphs showing cell viability (A), proliferation (B) and invasion (C) of MCF10A cells untreated and treated with EVs derived from 2D and 3D cultures of MKN45 and MKN74 cells. Results represent the mean  $\pm$  standard deviation of three biological replicates. Data was analyzed with one-way analysis of variance (ANOVA) with Tukey's multiple comparisons test.

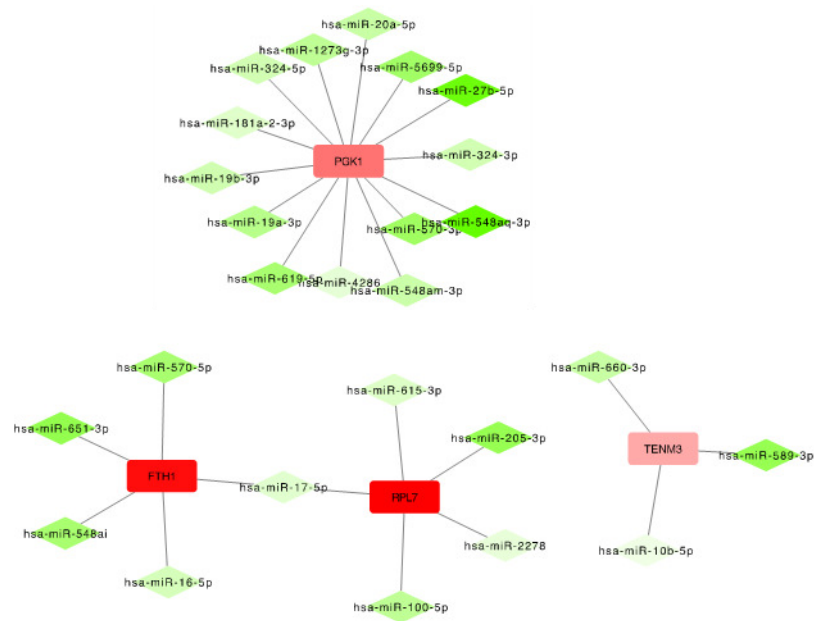

**Supplementary Figure 9. Protein set enrichment and integrative network analysis.** Three representative clusters showing that microRNAs (rhombs) target specific proteins (rectangles), being de-regulated in opposite direction. All proteins in EVs are down-regulated (red) while the microRNAs targeting these proteins are up-regulated (green).

## Supplementary Tables

Supplementary Table 1. Technical information regarding the 2D and 3D culture systems used in this study

|                                                               |              | 3D cultures                                 | 2D cultures                                 |
|---------------------------------------------------------------|--------------|---------------------------------------------|---------------------------------------------|
| <b>Working unit</b>                                           |              | 9.15 cm <sup>2</sup> agarose matrix         | 175 cm <sup>2</sup> flask                   |
| <b>Volume per working unit (mL)</b>                           |              | 6                                           | 20                                          |
| <b>Total period of culture (days)</b>                         |              | 7                                           | 5                                           |
| <b>Period of culture in EV-depleted medium (days)</b>         |              | 6                                           | 2                                           |
| <b>Number of cells at time of collection per working unit</b> | <b>MKN45</b> | 2,70x10 <sup>8</sup> ± 6,69x10 <sup>5</sup> | 1,77x10 <sup>7</sup> ± 8,36x10 <sup>6</sup> |
|                                                               | <b>MKN74</b> | 2,06x10 <sup>8</sup> ± 1,16x10 <sup>8</sup> | 1,88x10 <sup>7</sup> ± 6,15x10 <sup>6</sup> |
| <b>Number of EVs collected per working unit</b>               | <b>MKN45</b> | 2,42x10 <sup>9</sup> ± 1,09x10 <sup>9</sup> | 8,49x10 <sup>9</sup> ± 1,91x10 <sup>9</sup> |
|                                                               | <b>MKN74</b> | 2,02x10 <sup>9</sup> ± 1,35x10 <sup>9</sup> | 6,09x10 <sup>9</sup> ± 1,87x10 <sup>9</sup> |
| <b>Number of EVs collected per mL</b>                         | <b>MKN45</b> | 4,04x10 <sup>8</sup> ± 1,82x10 <sup>8</sup> | 4,25x10 <sup>8</sup> ± 9,55x10 <sup>7</sup> |
|                                                               | <b>MKN74</b> | 3,37x10 <sup>8</sup> ± 2,25x10 <sup>8</sup> | 3,04x10 <sup>8</sup> ± 9,37x10 <sup>7</sup> |
| <b>Number of EVs collected per cell</b>                       | <b>MKN45</b> | 1019,59 ± 687,36                            | 636,49 ± 374,97                             |
|                                                               | <b>MKN74</b> | 1656,11 ± 1621,61                           | 365,10 ± 165,67                             |

Results represent the mean ± standard deviation of four biological replicates.

**Supplementary Table 2. Total number of genes detected in each biological replicate according to specific small RNA classes**

| Small RNA Classes | Number of Annotated Genes | Total number of genes detected in each sample |      |      |      |      |      |      |      |       |      |      |      |      |      |      |      |
|-------------------|---------------------------|-----------------------------------------------|------|------|------|------|------|------|------|-------|------|------|------|------|------|------|------|
|                   |                           | MKN45                                         |      |      |      |      |      |      |      | MKN74 |      |      |      |      |      |      |      |
|                   |                           | Cells                                         |      |      |      | EVs  |      |      |      | Cells |      |      |      | EVs  |      |      |      |
|                   |                           | 2D                                            |      | 3D   |      | 2D   |      | 3D   |      | 2D    |      | 3D   |      | 2D   |      | 3D   |      |
|                   |                           | Rep1                                          | Rep2 | Rep1 | Rep2 | Rep1 | Rep2 | Rep1 | Rep2 | Rep1  | Rep2 | Rep1 | Rep2 | Rep1 | Rep2 | Rep1 | Rep2 |
| <b>miRNA</b>      | 2803                      | 778                                           | 162  | 687  | 758  | 27   | 148  | 212  | 217  | 660   | 711  | 843  | 813  | 168  | 177  | 184  | 219  |
| <b>misc_RNA</b>   | 1100                      | 112                                           | 9    | 165  | 166  | 64   | 98   | 87   | 102  | 159   | 84   | 166  | 407  | 53   | 71   | 22   | 87   |
| <b>Mt_tRNA</b>    | 3                         | 3                                             | 2    | 3    | 3    | 1    | 1    | 0    | 0    | 3     | 3    | 3    | 3    | 0    | 1    | 1    | 2    |
| <b>ribozyme</b>   | 6                         | 1                                             | 0    | 2    | 0    | 0    | 0    | 0    | 0    | 0     | 1    | 0    | 0    | 0    | 0    | 0    | 0    |
| <b>rRNA</b>       | 510                       | 253                                           | 88   | 230  | 297  | 11   | 18   | 34   | 31   | 316   | 184  | 196  | 419  | 20   | 42   | 11   | 48   |
| <b>scaRNA</b>     | 9                         | 7                                             | 2    | 8    | 9    | 0    | 2    | 1    | 1    | 8     | 6    | 7    | 9    | 0    | 1    | 0    | 1    |
| <b>scRNA</b>      | 1                         | 1                                             | 0    | 1    | 0    | 0    | 0    | 0    | 0    | 1     | 1    | 1    | 0    | 0    | 0    | 0    | 1    |
| <b>snoRNA</b>     | 234                       | 96                                            | 23   | 89   | 104  | 4    | 9    | 13   | 7    | 92    | 88   | 100  | 123  | 3    | 4    | 2    | 8    |
| <b>snRNA</b>      | 1801                      | 511                                           | 162  | 440  | 641  | 15   | 23   | 29   | 35   | 576   | 319  | 362  | 920  | 16   | 36   | 9    | 45   |
| <b>Total</b>      | 6467                      | 1762                                          | 448  | 1625 | 1978 | 122  | 299  | 376  | 393  | 1815  | 1397 | 1678 | 2694 | 260  | 332  | 229  | 411  |

**Supplementary Table 3. Over-representation analysis of 10 microRNAs exclusively present in EVs from 3D culture**

| Category                         | Subcategory                                             | Enrichment       | p-value    | expected  | observed | miRNAs/precursors                              |
|----------------------------------|---------------------------------------------------------|------------------|------------|-----------|----------|------------------------------------------------|
| <b>Diseases (miRWalk)</b>        | Burkitt Lymphoma                                        | over-represented | 8,3173E-05 | 0,157895  | 3        | hsa-miR-155-5p; hsa-miR-143-3p; hsa-miR-127-3p |
| <b>Organs (miRWalk)</b>          | Germinal Center                                         | over-represented | 0,00052901 | 0,0560748 | 2        | hsa-miR-155-5p; hsa-miR-127-3p                 |
| <b>Organs (miRWalk)</b>          | B-Lymphocytes                                           | over-represented | 0,00342595 | 0,476636  | 3        | hsa-miR-155-5p; hsa-miR-143-3p; hsa-miR-127-3p |
| <b>Target genes (miRTarbase)</b> | BCL6                                                    | over-represented | 0,0045355  | 0,128571  | 2        | hsa-miR-155-5p; hsa-miR-127-3p                 |
| <b>Target genes (miRTarbase)</b> | HK2                                                     | over-represented | 0,0045355  | 0,128571  | 2        | hsa-miR-155-5p; hsa-miR-143-3p                 |
| <b>Target genes (miRTarbase)</b> | MYO6                                                    | over-represented | 0,0045355  | 0,128571  | 2        | hsa-miR-155-5p; hsa-miR-143-3p                 |
| <b>Diseases (miRWalk)</b>        | Lymphoma                                                | over-represented | 0,00553097 | 0,552632  | 3        | hsa-miR-155-5p; hsa-miR-143-3p; hsa-miR-127-3p |
| <b>Gene Ontology (miRWalk)</b>   | GO0042092 type 2 immune response                        | over-represented | 0,00631842 | 0,15      | 2        | hsa-miR-155-5p; hsa-miR-127-3p                 |
| <b>Target genes (miRTarbase)</b> | KRAS                                                    | over-represented | 0,00838286 | 0,171429  | 2        | hsa-miR-155-5p; hsa-miR-143-3p                 |
| <b>Gene Ontology (miRWalk)</b>   | GO0002829 negative regulation of type 2 immune response | over-represented | 0,0107243  | 0,192857  | 2        | hsa-miR-155-5p; hsa-miR-127-3p                 |
| <b>Target genes (miRTarbase)</b> | FNDC3B                                                  | over-represented | 0,0107243  | 0,192857  | 2        | hsa-miR-155-5p; hsa-miR-143-3p                 |
| <b>Diseases (miRWalk)</b>        | Lymphoma B-Cell                                         | over-represented | 0,0160689  | 0,236842  | 2        | hsa-miR-155-5p; hsa-miR-143-3p                 |
| <b>Gene Ontology (miRWalk)</b>   | GO0034968 histone lysine methylation                    | over-represented | 0,0193664  | 0,257143  | 2        | hsa-miR-155-5p; hsa-miR-127-3p                 |
| <b>Gene Ontology (miRWalk)</b>   | GO0045579 positive regulation of b cell differentiation | over-represented | 0,0193664  | 0,257143  | 2        | hsa-miR-155-5p; hsa-miR-127-3p                 |
| <b>Gene Ontology (miRWalk)</b>   | GO0004396 hexokinase activity                           | over-represented | 0,0227713  | 0,278571  | 2        | hsa-miR-155-5p; hsa-miR-143-3p                 |
| <b>Gene Ontology (miRWalk)</b>   | GO0034405 response to fluid shear stress                | over-represented | 0,0227713  | 0,278571  | 2        | hsa-miR-155-5p; hsa-miR-143-3p                 |
| <b>Gene Ontology (miRWalk)</b>   | GO0042730 fibrinolysis                                  | over-represented | 0,0227713  | 0,278571  | 2        | hsa-miR-155-5p; hsa-miR-143-3p                 |
| <b>Gene Ontology (miRWalk)</b>   | GO0045334 clathrin coated endocytic vesicle             | over-represented | 0,0227713  | 0,278571  | 2        | hsa-miR-155-5p; hsa-miR-143-3p                 |
| <b>Gene Ontology (miRWalk)</b>   | GO0005536 glucose binding                               | over-represented | 0,026431   | 0,3       | 2        | hsa-miR-155-5p; hsa-miR-143-3p                 |
| <b>Gene Ontology (miRWalk)</b>   | GO0030195 negative                                      | over-represented | 0,026431   | 0,3       | 2        | hsa-miR-155-5p; hsa-miR-143-3p                 |

|                                |                                                                  |                  |           |          |   |                                                |
|--------------------------------|------------------------------------------------------------------|------------------|-----------|----------|---|------------------------------------------------|
|                                | regulation of blood coagulation                                  |                  |           |          |   |                                                |
| <b>Gene Ontology (miRWalk)</b> | GO0044027 hypermethylation of cpg island                         | over-represented | 0,026431  | 0,3      | 2 | hsa-miR-155-5p; hsa-miR-143-3p                 |
| <b>Gene Ontology (miRWalk)</b> | GO0051385 response to mineralocorticoid stimulus                 | over-represented | 0,026431  | 0,3      | 2 | hsa-miR-155-5p; hsa-miR-143-3p                 |
| <b>Gene Ontology (miRWalk)</b> | GO0050727 regulation of inflammatory response                    | over-represented | 0,0275727 | 0,921429 | 3 | hsa-miR-155-5p; hsa-miR-143-3p; hsa-miR-127-3p |
| <b>Gene Ontology (miRWalk)</b> | GO0000060 protein import into nucleus translocation              | over-represented | 0,0295902 | 0,942857 | 3 | hsa-miR-155-5p; hsa-miR-143-3p; hsa-miR-127-3p |
| <b>Gene Ontology (miRWalk)</b> | GO0000302 response to reactive oxygen species                    | over-represented | 0,0303409 | 0,321429 | 2 | hsa-miR-155-5p; hsa-miR-143-3p                 |
| <b>Gene Ontology (miRWalk)</b> | GO0002634 regulation of germinal center formation                | over-represented | 0,0303409 | 0,321429 | 2 | hsa-miR-155-5p; hsa-miR-127-3p                 |
| <b>Gene Ontology (miRWalk)</b> | GO0030275 Irr domain binding                                     | over-represented | 0,0303409 | 0,321429 | 2 | hsa-miR-155-5p; hsa-miR-143-3p                 |
| <b>Gene Ontology (miRWalk)</b> | GO0046324 regulation of glucose import                           | over-represented | 0,0303409 | 0,321429 | 2 | hsa-miR-155-5p; hsa-miR-143-3p                 |
| <b>Gene Ontology (miRWalk)</b> | GO0061045 negative regulation of wound healing                   | over-represented | 0,0303409 | 0,321429 | 2 | hsa-miR-155-5p; hsa-miR-143-3p                 |
| <b>Gene Ontology (miRWalk)</b> | GO0002467 germinal center formation                              | over-represented | 0,0344966 | 0,342857 | 2 | hsa-miR-155-5p; hsa-miR-127-3p                 |
| <b>Gene Ontology (miRWalk)</b> | GO0010757 negative regulation of plasminogen activation          | over-represented | 0,0344966 | 0,342857 | 2 | hsa-miR-155-5p; hsa-miR-143-3p                 |
| <b>Gene Ontology (miRWalk)</b> | GO0032287 peripheral nervous system myelin maintenance           | over-represented | 0,0344966 | 0,342857 | 2 | hsa-miR-155-5p; hsa-miR-143-3p                 |
| <b>Gene Ontology (miRWalk)</b> | GO0035022 positive regulation of rac protein signal transduction | over-represented | 0,0344966 | 0,342857 | 2 | hsa-miR-155-5p; hsa-miR-143-3p                 |
| <b>Pathways (miRWalk)</b>      | WP272 Blood Clotting Cascade                                     | over-represented | 0,0359716 | 0,350365 | 2 | hsa-miR-155-5p; hsa-miR-143-3p                 |
| <b>Gene Ontology (miRWalk)</b> | GO0016461 unconventional myosin complex                          | over-represented | 0,0388936 | 0,364286 | 2 | hsa-miR-155-5p; hsa-miR-143-3p                 |
| <b>Gene Ontology (miRWalk)</b> | GO0051602 response to electrical stimulus                        | over-represented | 0,0388936 | 0,364286 | 2 | hsa-miR-155-5p; hsa-miR-127-3p                 |
| <b>Gene Ontology (miRWalk)</b> | GO0002903 negative regulation of b cell apoptotic                | over-represented | 0,0435274 | 0,385714 | 2 | hsa-miR-155-5p; hsa-miR-127-3p                 |



|                                | process                                                          |                  |           |          |   |                                                |
|--------------------------------|------------------------------------------------------------------|------------------|-----------|----------|---|------------------------------------------------|
| <b>Gene Ontology (miRWalk)</b> | GO0003886 dna cytosine 5 methyltransferase activity              | over-represented | 0,0435274 | 0,385714 | 2 | hsa-miR-155-5p; hsa-miR-143-3p                 |
| <b>Gene Ontology (miRWalk)</b> | GO0006809 nitric oxide biosynthetic process                      | over-represented | 0,0435274 | 0,385714 | 2 | hsa-miR-155-5p; hsa-miR-143-3p                 |
| <b>Gene Ontology (miRWalk)</b> | GO0035024 negative regulation of rho protein signal transduction | over-represented | 0,0435274 | 0,385714 | 2 | hsa-miR-155-5p; hsa-miR-127-3p                 |
| <b>Gene Ontology (miRWalk)</b> | GO0050829 defense response to gram negative bacterium            | over-represented | 0,0435274 | 0,385714 | 2 | hsa-miR-155-5p; hsa-miR-143-3p                 |
| <b>Gene Ontology (miRWalk)</b> | GO0051918 negative regulation of fibrinolysis                    | over-represented | 0,0435274 | 0,385714 | 2 | hsa-miR-155-5p; hsa-miR-143-3p                 |
| <b>Gene Ontology (miRWalk)</b> | GO0007281 germ cell development                                  | over-represented | 0,0437911 | 1,07143  | 3 | hsa-miR-155-5p; hsa-miR-143-3p; hsa-miR-127-3p |
| <b>Gene Ontology (miRWalk)</b> | GO0030194 positive regulation of blood coagulation               | over-represented | 0,0483936 | 0,407143 | 2 | hsa-miR-155-5p; hsa-miR-143-3p                 |
| <b>Gene Ontology (miRWalk)</b> | GO0032228 regulation of synaptic transmission gabaergic          | over-represented | 0,0483936 | 0,407143 | 2 | hsa-miR-155-5p; hsa-miR-143-3p                 |
| <b>Gene Ontology (miRWalk)</b> | GO0032757 positive regulation of interleukin 8 production        | over-represented | 0,0483936 | 0,407143 | 2 | hsa-miR-155-5p; hsa-miR-143-3p                 |
| <b>Gene Ontology (miRWalk)</b> | GO0043589 skin morphogenesis                                     | over-represented | 0,0483936 | 0,407143 | 2 | hsa-miR-155-5p; hsa-miR-143-3p                 |
| <b>Gene Ontology (miRWalk)</b> | GO0051926 negative regulation of calcium ion transport           | over-represented | 0,0483936 | 0,407143 | 2 | hsa-miR-155-5p; hsa-miR-143-3p                 |

**Supplementary Table 4. Over-representation analysis of 64 microRNAs detected in EVs from 3D culture, absent in EVs from 2D culture and present in both, cells growing in 2D and 3D cultures**

| Category                         | Subcategory                                        | Enrichment       | p-value   | expected | observed | miRNAs/precursors                                                                                          |
|----------------------------------|----------------------------------------------------|------------------|-----------|----------|----------|------------------------------------------------------------------------------------------------------------|
| <b>Target genes (miRTarbase)</b> | PIP5K1A                                            | over-represented | 0,0100419 | 2,03571  | 5        | hsa-miR-222-3p; hsa-miR-1226-3p; hsa-miR-132-3p; hsa-miR-615-3p; hsa-miR-744-5p                            |
| <b>Organs (miRWalk)</b>          | Blood Platelets                                    | over-represented | 0,0128746 | 3,18692  | 7        | hsa-let-7e-5p; hsa-miR-10a-5p; hsa-let-7d-3p; hsa-let-7c-5p; hsa-miR-151a-5p; hsa-let-7i-5p; hsa-miR-28-5p |
| <b>Target genes (miRTarbase)</b> | OTUD5                                              | over-represented | 0,0257678 | 1,62857  | 4        | hsa-let-7e-5p; hsa-miR-339-5p; hsa-miR-1260b; hsa-miR-505-3p                                               |
| <b>Target genes (miRTarbase)</b> | RPA1                                               | over-represented | 0,0257678 | 1,62857  | 4        | hsa-let-7e-5p; hsa-miR-31-5p; hsa-miR-339-5p; hsa-miR-615-3p                                               |
| <b>Gene Ontology (miRWalk)</b>   | GO0048846 axon extension involved in axon guidance | over-represented | 0,0409112 | 2,44286  | 5        | hsa-let-7e-5p; hsa-miR-324-5p; hsa-miR-26b-5p; hsa-miR-326; hsa-miR-330-3p                                 |
| <b>Target genes (miRTarbase)</b> | MCM2                                               | over-represented | 0,0409112 | 2,44286  | 5        | hsa-miR-423-3p; hsa-miR-31-5p; hsa-miR-1226-3p; hsa-miR-615-3p; hsa-miR-500a-5p                            |

Supplementary Table 5. GSEA Analysis of 164 microRNAs detected in EVs from 3D culture – top-20 hits

| Category           | Subcategory         | Enrichment | p-value  | observed | miRNAs/precursors                                                                                                                                                                                                                                                                                                                                                                                                                                                                                                                                                                                                                                                                                                                                                                                                                                                                                                                                                                                                                                                                                                                                                                                                                                                                                                                                                                                                                                                                                                                                                                                                                                                                                                                                      |
|--------------------|---------------------|------------|----------|----------|--------------------------------------------------------------------------------------------------------------------------------------------------------------------------------------------------------------------------------------------------------------------------------------------------------------------------------------------------------------------------------------------------------------------------------------------------------------------------------------------------------------------------------------------------------------------------------------------------------------------------------------------------------------------------------------------------------------------------------------------------------------------------------------------------------------------------------------------------------------------------------------------------------------------------------------------------------------------------------------------------------------------------------------------------------------------------------------------------------------------------------------------------------------------------------------------------------------------------------------------------------------------------------------------------------------------------------------------------------------------------------------------------------------------------------------------------------------------------------------------------------------------------------------------------------------------------------------------------------------------------------------------------------------------------------------------------------------------------------------------------------|
| Diseases (miRWalk) | Neoplasms           | enriched   | 4,03E-09 | 106      | hsa-miR-181a-5p; hsa-miR-223-3p; hsa-let-7b-5p; hsa-miR-23a-3p; hsa-miR-21-5p; hsa-miR-200c-3p; hsa-miR-27a-3p; hsa-miR-34a-5p; hsa-miR-191-5p; hsa-miR-125a-5p; hsa-miR-221-3p; hsa-miR-451a; hsa-miR-93-5p; hsa-miR-205-5p; hsa-miR-192-5p; hsa-miR-320a; hsa-let-7f-5p; hsa-miR-20a-5p; hsa-miR-17-5p; hsa-miR-26a-5p; hsa-miR-193b-3p; hsa-let-7e-5p; hsa-miR-183-5p; hsa-miR-365a-3p; hsa-miR-197-3p; hsa-miR-19b-3p; hsa-miR-27b-3p; hsa-miR-122-5p; hsa-miR-24-3p; hsa-miR-103a-3p; hsa-miR-144-3p; hsa-miR-16-5p; hsa-miR-149-5p; hsa-miR-106b-5p; hsa-let-7g-5p; hsa-miR-200b-3p; hsa-miR-423-3p; hsa-miR-141-3p; hsa-miR-30c-5p; hsa-miR-23b-3p; hsa-miR-19a-3p; hsa-miR-195-5p; hsa-miR-203a-3p; hsa-miR-186-5p; hsa-miR-31-5p; hsa-miR-126-3p; hsa-let-7d-5p; hsa-miR-150-5p; hsa-miR-146a-5p; hsa-let-7a-5p; hsa-miR-18a-5p; hsa-miR-222-3p; hsa-miR-126-5p; hsa-miR-10a-5p; hsa-miR-200a-3p; hsa-miR-375; hsa-miR-145-5p; hsa-miR-324-5p; hsa-miR-185-5p; hsa-miR-133a-3p; hsa-miR-106a-5p; hsa-let-7d-3p; hsa-miR-135b-5p; hsa-miR-7-5p; hsa-miR-339-5p; hsa-miR-146b-5p; hsa-miR-378a-3p; hsa-miR-15a-5p; hsa-miR-125b-5p; hsa-miR-107; hsa-miR-25-3p; hsa-miR-429; hsa-miR-26b-5p; hsa-miR-92a-3p; hsa-miR-15b-5p; hsa-miR-29b-3p; hsa-miR-342-3p; hsa-miR-155-5p; hsa-miR-100-5p; hsa-miR-128-3p; hsa-miR-182-5p; hsa-miR-106b-3p; hsa-let-7c-5p; hsa-miR-345-5p; hsa-miR-29a-3p; hsa-miR-143-3p; hsa-miR-489-3p; hsa-miR-210-3p; hsa-miR-181b-5p; hsa-miR-127-3p; hsa-miR-151a-5p; hsa-miR-96-5p; hsa-miR-30a-3p; hsa-miR-326; hsa-miR-1226-3p; hsa-miR-199b-5p; hsa-miR-132-3p; hsa-miR-30c-1-3p; hsa-miR-330-3p; hsa-miR-124-3p; hsa-miR-199a-3p; hsa-miR-28-5p; hsa-miR-148b-3p; hsa-miR-193a-5p; hsa-miR-301a-3p; hsa-miR-22-3p |
| Diseases (miRWalk) | Carcinoma           | enriched   | 9,14E-07 | 70       | hsa-miR-181a-5p; hsa-miR-223-3p; hsa-let-7b-5p; hsa-miR-23a-3p; hsa-miR-21-5p; hsa-miR-200c-3p; hsa-miR-30d-5p; hsa-miR-34a-5p; hsa-miR-191-5p; hsa-miR-125a-5p; hsa-miR-221-3p; hsa-miR-451a; hsa-miR-93-5p; hsa-miR-205-5p; hsa-miR-192-5p; hsa-let-7f-5p; hsa-miR-17-5p; hsa-miR-26a-5p; hsa-miR-193b-3p; hsa-miR-183-5p; hsa-miR-197-3p; hsa-miR-19b-3p; hsa-miR-122-5p; hsa-miR-24-3p; hsa-miR-16-5p; hsa-miR-106b-5p; hsa-let-7g-5p; hsa-miR-200b-3p; hsa-miR-141-3p; hsa-miR-23b-3p; hsa-miR-19a-3p; hsa-miR-195-5p; hsa-miR-203a-3p; hsa-miR-186-5p; hsa-miR-31-5p; hsa-miR-126-3p; hsa-miR-146a-5p; hsa-let-7a-5p; hsa-miR-18a-5p; hsa-miR-222-3p; hsa-miR-200a-3p; hsa-miR-375; hsa-miR-145-5p; hsa-miR-185-5p; hsa-miR-133a-3p; hsa-miR-135b-5p; hsa-miR-7-5p; hsa-miR-146b-5p; hsa-miR-15a-5p; hsa-miR-125b-5p; hsa-miR-107; hsa-miR-429; hsa-miR-26b-5p; hsa-miR-29b-3p; hsa-miR-100-5p; hsa-miR-182-5p; hsa-let-7c-5p; hsa-miR-29a-3p; hsa-miR-143-3p; hsa-miR-489-3p; hsa-miR-210-3p; hsa-miR-181b-5p; hsa-miR-151a-5p; hsa-miR-1226-3p; hsa-miR-199b-5p; hsa-miR-124-3p; hsa-miR-199a-3p; hsa-miR-193a-5p; hsa-miR-301a-3p; hsa-miR-22-3p                                                                                                                                                                                                                                                                                                                                                                                                                                                                                                                                                                                              |
| Diseases (miRWalk) | Lung Neoplasms      | enriched   | 2,12E-05 | 28       | hsa-let-7b-5p; hsa-miR-21-5p; hsa-miR-200c-3p; hsa-miR-221-3p; hsa-miR-451a; hsa-miR-93-5p; hsa-let-7f-5p; hsa-miR-20a-5p; hsa-let-7e-5p; hsa-miR-183-5p; hsa-miR-197-3p; hsa-miR-16-5p; hsa-let-7g-5p; hsa-miR-200b-3p; hsa-miR-30c-5p; hsa-miR-19a-3p; hsa-miR-31-5p; hsa-miR-126-3p; hsa-let-7a-5p; hsa-miR-222-3p; hsa-miR-145-5p; hsa-miR-185-5p; hsa-miR-15a-5p; hsa-miR-107; hsa-miR-429; hsa-miR-29b-3p; hsa-miR-29a-3p; hsa-miR-22-3p                                                                                                                                                                                                                                                                                                                                                                                                                                                                                                                                                                                                                                                                                                                                                                                                                                                                                                                                                                                                                                                                                                                                                                                                                                                                                                         |
| Diseases (miRWalk) | Neoplasm Metastasis | enriched   | 2,43E-04 | 49       | hsa-miR-223-3p; hsa-miR-23a-3p; hsa-miR-21-5p; hsa-miR-200c-3p; hsa-miR-30d-5p; hsa-miR-34a-5p; hsa-miR-125a-5p; hsa-miR-451a; hsa-miR-205-5p; hsa-miR-320a; hsa-miR-20a-5p; hsa-miR-17-5p; hsa-miR-26a-5p; hsa-miR-193b-3p; hsa-miR-183-5p; hsa-miR-197-3p; hsa-miR-122-5p; hsa-miR-103a-3p; hsa-miR-144-3p; hsa-miR-16-5p; hsa-miR-200b-3p; hsa-miR-141-3p; hsa-miR-23b-3p; hsa-miR-31-5p; hsa-miR-150-5p; hsa-miR-146a-5p; hsa-let-7a-5p; hsa-miR-222-3p; hsa-miR-10a-5p; hsa-miR-200a-3p; hsa-miR-145-5p; hsa-miR-324-5p; hsa-miR-339-5p; hsa-miR-125b-5p; hsa-miR-107; hsa-miR-429; hsa-miR-26b-5p; hsa-miR-29b-3p; hsa-miR-155-5p; hsa-miR-182-5p; hsa-miR-194-5p; hsa-miR-486-5p; hsa-miR-29a-3p; hsa-miR-143-3p; hsa-miR-210-3p; hsa-miR-151a-5p; hsa-miR-326; hsa-miR-199b-5p; hsa-miR-124-3p                                                                                                                                                                                                                                                                                                                                                                                                                                                                                                                                                                                                                                                                                                                                                                                                                                                                                                                                                 |
| Diseases (miRWalk) | Inflammation        | enriched   | 2,44E-04 | 30       | hsa-miR-181a-5p; hsa-miR-223-3p; hsa-miR-21-5p; hsa-miR-221-3p; hsa-miR-192-5p; hsa-let-7f-5p; hsa-miR-19b-3p; hsa-miR-27b-3p; hsa-let-7g-5p; hsa-miR-141-3p; hsa-miR-19a-3p; hsa-miR-195-5p; hsa-miR-                                                                                                                                                                                                                                                                                                                                                                                                                                                                                                                                                                                                                                                                                                                                                                                                                                                                                                                                                                                                                                                                                                                                                                                                                                                                                                                                                                                                                                                                                                                                                 |

|                           |                               |          |          |    |                                                                                                                                                                                                                                                                                                                                                                                                                                                                                                                                                                                                                                                                                                                                                                                                                                                                                                                                                                                                                                                                                                                                                                                                                                                                                                                                                                                                                                                                                                           |
|---------------------------|-------------------------------|----------|----------|----|-----------------------------------------------------------------------------------------------------------------------------------------------------------------------------------------------------------------------------------------------------------------------------------------------------------------------------------------------------------------------------------------------------------------------------------------------------------------------------------------------------------------------------------------------------------------------------------------------------------------------------------------------------------------------------------------------------------------------------------------------------------------------------------------------------------------------------------------------------------------------------------------------------------------------------------------------------------------------------------------------------------------------------------------------------------------------------------------------------------------------------------------------------------------------------------------------------------------------------------------------------------------------------------------------------------------------------------------------------------------------------------------------------------------------------------------------------------------------------------------------------------|
|                           |                               |          |          |    | 203a-3p; hsa-miR-31-5p; hsa-miR-126-3p; hsa-let-7d-5p; hsa-miR-146a-5p; hsa-let-7a-5p; hsa-miR-10a-5p; hsa-miR-200a-3p; hsa-miR-769-5p; hsa-miR-7-5p; hsa-miR-146b-5p; hsa-miR-107; hsa-miR-25-3p; hsa-miR-29b-3p; hsa-miR-155-5p; hsa-miR-181b-5p; hsa-let-7i-5p; hsa-miR-22-3p                                                                                                                                                                                                                                                                                                                                                                                                                                                                                                                                                                                                                                                                                                                                                                                                                                                                                                                                                                                                                                                                                                                                                                                                                          |
| <b>Diseases (miRWalk)</b> | Shock                         | enriched | 4,49E-04 | 2  | hsa-miR-223-3p; hsa-let-7b-5p                                                                                                                                                                                                                                                                                                                                                                                                                                                                                                                                                                                                                                                                                                                                                                                                                                                                                                                                                                                                                                                                                                                                                                                                                                                                                                                                                                                                                                                                             |
| <b>Diseases (miRWalk)</b> | Carcinoma Hepatocellular      | enriched | 5,49E-04 | 43 | hsa-miR-181a-5p; hsa-miR-223-3p; hsa-let-7b-5p; hsa-miR-23a-3p; hsa-miR-21-5p; hsa-miR-30d-5p; hsa-miR-191-5p; hsa-miR-125a-5p; hsa-miR-221-3p; hsa-miR-93-5p; hsa-miR-26a-5p; hsa-miR-193b-3p; hsa-miR-183-5p; hsa-miR-122-5p; hsa-miR-144-3p; hsa-miR-16-5p; hsa-miR-106b-5p; hsa-let-7g-5p; hsa-miR-23b-3p; hsa-miR-195-5p; hsa-miR-203a-3p; hsa-miR-186-5p; hsa-let-7a-5p; hsa-miR-18a-5p; hsa-miR-222-3p; hsa-miR-200a-3p; hsa-miR-375; hsa-miR-145-5p; hsa-miR-185-5p; hsa-miR-125b-5p; hsa-miR-29b-3p; hsa-let-7c-5p; hsa-miR-29a-3p; hsa-miR-143-3p; hsa-miR-210-3p; hsa-miR-181b-5p; hsa-miR-151a-5p; hsa-miR-199b-5p; hsa-miR-30c-1-3p; hsa-miR-124-3p; hsa-miR-199a-3p; hsa-miR-301a-3p; hsa-miR-22-3p; hsa-miR-21-5p; hsa-miR-200c-3p; hsa-miR-27a-3p; hsa-miR-34a-5p; hsa-miR-125a-5p; hsa-miR-221-3p; hsa-miR-451a; hsa-miR-205-5p; hsa-let-7f-5p; hsa-miR-20a-5p; hsa-miR-17-5p; hsa-miR-193b-3p; hsa-miR-103a-3p; hsa-miR-16-5p; hsa-miR-200b-3p; hsa-miR-141-3p; hsa-miR-30c-5p; hsa-miR-203a-3p; hsa-miR-31-5p; hsa-miR-126-3p; hsa-miR-150-5p; hsa-miR-146a-5p; hsa-let-7a-5p; hsa-miR-222-3p; hsa-miR-200a-3p; hsa-miR-375; hsa-miR-145-5p; hsa-miR-185-5p; hsa-miR-7-5p; hsa-miR-339-5p; hsa-miR-146b-5p; hsa-miR-125b-5p; hsa-miR-107; hsa-miR-92a-3p; hsa-miR-29b-3p; hsa-miR-342-3p; hsa-miR-155-5p; hsa-miR-128-3p; hsa-miR-182-5p; hsa-miR-345-5p; hsa-miR-29a-3p; hsa-miR-181b-5p; hsa-miR-96-5p; hsa-miR-326; hsa-miR-1226-3p; hsa-miR-330-3p; hsa-miR-199a-3p; hsa-miR-22-3p |
| <b>Diseases (miRWalk)</b> | Breast Neoplasms              | enriched | 9,60E-04 | 48 | hsa-miR-21-5p; hsa-miR-200c-3p; hsa-miR-34a-5p; hsa-miR-221-3p; hsa-miR-205-5p; hsa-miR-26a-5p; hsa-miR-122-5p; hsa-miR-16-5p; hsa-miR-106b-5p; hsa-miR-141-3p; hsa-miR-126-3p; hsa-miR-146a-5p; hsa-let-7a-5p; hsa-miR-126-5p; hsa-miR-145-5p; hsa-miR-185-5p; hsa-miR-125b-5p; hsa-miR-107; hsa-miR-29b-3p; hsa-miR-143-3p; hsa-miR-330-3p                                                                                                                                                                                                                                                                                                                                                                                                                                                                                                                                                                                                                                                                                                                                                                                                                                                                                                                                                                                                                                                                                                                                                              |
| <b>Diseases (miRWalk)</b> | Insulin Resistance            | enriched | 1,12E-03 | 2  | hsa-miR-181a-5p; hsa-miR-21-5p                                                                                                                                                                                                                                                                                                                                                                                                                                                                                                                                                                                                                                                                                                                                                                                                                                                                                                                                                                                                                                                                                                                                                                                                                                                                                                                                                                                                                                                                            |
| <b>Diseases (miRWalk)</b> | Prostatic Neoplasms           | enriched | 1,13E-03 | 21 | hsa-let-7b-5p; hsa-miR-21-5p; hsa-miR-34a-5p; hsa-miR-192-5p; hsa-miR-320a; hsa-miR-183-5p; hsa-miR-365a-3p; hsa-miR-106b-5p; hsa-miR-195-5p; hsa-miR-186-5p; hsa-miR-126-3p; hsa-let-7a-5p; hsa-miR-145-5p; hsa-miR-107; hsa-miR-25-3p; hsa-miR-15b-5p; hsa-miR-143-3p                                                                                                                                                                                                                                                                                                                                                                                                                                                                                                                                                                                                                                                                                                                                                                                                                                                                                                                                                                                                                                                                                                                                                                                                                                   |
| <b>Diseases (miRWalk)</b> | Colonic Neoplasms             | enriched | 1,21E-03 | 17 | hsa-miR-21-5p; hsa-miR-191-5p; hsa-miR-125a-5p; hsa-miR-221-3p; hsa-miR-451a; hsa-miR-20a-5p; hsa-miR-26a-5p; hsa-miR-183-5p; hsa-miR-122-5p; hsa-miR-203a-3p; hsa-miR-29b-3p; hsa-miR-100-5p; hsa-miR-326; hsa-miR-124-3p                                                                                                                                                                                                                                                                                                                                                                                                                                                                                                                                                                                                                                                                                                                                                                                                                                                                                                                                                                                                                                                                                                                                                                                                                                                                                |
| <b>Diseases (miRWalk)</b> | Recurrence                    | enriched | 1,45E-03 | 14 | hsa-miR-181a-5p; hsa-miR-21-5p; hsa-miR-34a-5p; hsa-miR-221-3p; hsa-miR-451a; hsa-miR-93-5p; hsa-miR-192-5p; hsa-miR-20a-5p; hsa-miR-17-5p; hsa-miR-26a-5p; hsa-miR-24-3p; hsa-miR-19a-3p; hsa-miR-195-5p; hsa-let-7d-5p; hsa-let-7a-5p; hsa-miR-18a-5p; hsa-miR-222-3p; hsa-miR-7-5p; hsa-miR-146b-5p; hsa-miR-92a-3p; hsa-miR-128-3p; hsa-miR-326; hsa-miR-199b-5p; hsa-miR-124-3p                                                                                                                                                                                                                                                                                                                                                                                                                                                                                                                                                                                                                                                                                                                                                                                                                                                                                                                                                                                                                                                                                                                      |
| <b>Diseases (miRWalk)</b> | Glioblastoma                  | enriched | 1,45E-03 | 24 | hsa-miR-21-5p; hsa-miR-221-3p; hsa-miR-451a; hsa-miR-16-5p; hsa-let-7g-5p; hsa-miR-31-5p; hsa-miR-222-3p; hsa-miR-145-5p; hsa-miR-185-5p; hsa-miR-15a-5p; hsa-miR-107                                                                                                                                                                                                                                                                                                                                                                                                                                                                                                                                                                                                                                                                                                                                                                                                                                                                                                                                                                                                                                                                                                                                                                                                                                                                                                                                     |
| <b>Diseases (miRWalk)</b> | Carcinoma Non-Small-Cell Lung | enriched | 1,75E-03 | 11 | hsa-miR-181a-5p; hsa-miR-30b-5p; hsa-let-7b-5p; hsa-miR-21-5p; hsa-miR-200c-3p; hsa-miR-34a-5p; hsa-let-7f-5p; hsa-miR-20a-5p; hsa-miR-17-5p; hsa-miR-26a-5p; hsa-miR-16-5p; hsa-miR-200b-3p; hsa-let-7a-5p; hsa-miR-200a-3p; hsa-miR-375; hsa-miR-15a-5p; hsa-miR-29b-3p; hsa-miR-155-5p; hsa-miR-29a-3p; hsa-miR-143-3p; hsa-miR-127-3p                                                                                                                                                                                                                                                                                                                                                                                                                                                                                                                                                                                                                                                                                                                                                                                                                                                                                                                                                                                                                                                                                                                                                                 |
| <b>Diseases (miRWalk)</b> | Lymphoma                      | enriched | 2,96E-03 | 21 | hsa-let-7b-5p; hsa-miR-205-5p; hsa-miR-193b-3p                                                                                                                                                                                                                                                                                                                                                                                                                                                                                                                                                                                                                                                                                                                                                                                                                                                                                                                                                                                                                                                                                                                                                                                                                                                                                                                                                                                                                                                            |
| <b>Diseases (miRWalk)</b> | Nevus                         | enriched | 3,19E-03 | 3  | hsa-let-7b-5p; hsa-miR-21-5p; hsa-miR-34a-5p; hsa-miR-26a-5p; hsa-miR-145-5p                                                                                                                                                                                                                                                                                                                                                                                                                                                                                                                                                                                                                                                                                                                                                                                                                                                                                                                                                                                                                                                                                                                                                                                                                                                                                                                                                                                                                              |
| <b>Diseases (miRWalk)</b> | Encephalitis                  | enriched | 4,78E-03 | 5  | hsa-let-7b-5p; hsa-miR-21-5p; hsa-miR-34a-5p; hsa-miR-26a-5p; hsa-miR-145-5p                                                                                                                                                                                                                                                                                                                                                                                                                                                                                                                                                                                                                                                                                                                                                                                                                                                                                                                                                                                                                                                                                                                                                                                                                                                                                                                                                                                                                              |
| <b>Diseases (miRWalk)</b> | Cholangiocarcinoma            | enriched | 5,15E-03 | 4  | hsa-miR-21-5p; hsa-miR-320a; hsa-miR-200b-3p; hsa-miR-141-3p                                                                                                                                                                                                                                                                                                                                                                                                                                                                                                                                                                                                                                                                                                                                                                                                                                                                                                                                                                                                                                                                                                                                                                                                                                                                                                                                                                                                                                              |
| <b>Diseases (miRWalk)</b> | Stomach Neoplasms             | enriched | 5,90E-03 | 27 | hsa-miR-223-3p; hsa-miR-23a-3p; hsa-miR-21-5p; hsa-miR-27a-3p; hsa-miR-34a-5p; hsa-miR-125a-5p; hsa-miR-221-3p; hsa-miR-451a; hsa-miR-93-5p; hsa-miR-16-5p; hsa-miR-106b-5p; hsa-miR-126-3p; hsa-                                                                                                                                                                                                                                                                                                                                                                                                                                                                                                                                                                                                                                                                                                                                                                                                                                                                                                                                                                                                                                                                                                                                                                                                                                                                                                         |

|                               |          |          |          |    |                                                                                                                                                                                                                                                                                                                                                                                                                                                                                                                                                                                                                                                                                                                                                                                                                                                   |
|-------------------------------|----------|----------|----------|----|---------------------------------------------------------------------------------------------------------------------------------------------------------------------------------------------------------------------------------------------------------------------------------------------------------------------------------------------------------------------------------------------------------------------------------------------------------------------------------------------------------------------------------------------------------------------------------------------------------------------------------------------------------------------------------------------------------------------------------------------------------------------------------------------------------------------------------------------------|
| <b>Diseases<br/>(miRWalk)</b> | Leukemia | enriched | 5,92E-03 | 37 | miR-150-5p; hsa-miR-146a-5p; hsa-let-7a-5p; hsa-miR-222-3p; hsa-miR-375; hsa-miR-106a-5p; hsa-miR-107; hsa-miR-25-3p; hsa-miR-15b-5p; hsa-miR-29b-3p; hsa-miR-182-5p; hsa-miR-106b-3p; hsa-miR-143-3p; hsa-miR-148b-3p; hsa-miR-22-3p<br>hsa-miR-181a-5p; hsa-miR-223-3p; hsa-miR-21-5p; hsa-miR-34a-5p; hsa-miR-125a-5p; hsa-miR-221-3p; hsa-miR-93-5p; hsa-miR-320a; hsa-miR-26a-5p; hsa-miR-19b-3p; hsa-miR-122-5p; hsa-miR-24-3p; hsa-miR-16-5p; hsa-miR-106b-5p; hsa-miR-126-3p; hsa-miR-150-5p; hsa-let-7a-5p; hsa-miR-222-3p; hsa-miR-10a-5p; hsa-miR-200a-3p; hsa-miR-145-5p; hsa-miR-106a-5p; hsa-miR-135b-5p; hsa-miR-15a-5p; hsa-miR-125b-5p; hsa-miR-107; hsa-miR-92a-3p; hsa-miR-29b-3p; hsa-miR-155-5p; hsa-miR-128-3p; hsa-miR-29a-3p; hsa-miR-505-3p; hsa-miR-143-3p; hsa-miR-181b-5p; hsa-miR-326; hsa-miR-124-3p; hsa-miR-22-3p |
|-------------------------------|----------|----------|----------|----|---------------------------------------------------------------------------------------------------------------------------------------------------------------------------------------------------------------------------------------------------------------------------------------------------------------------------------------------------------------------------------------------------------------------------------------------------------------------------------------------------------------------------------------------------------------------------------------------------------------------------------------------------------------------------------------------------------------------------------------------------------------------------------------------------------------------------------------------------|

**Supplementary Table 6. Top-20 proteins mostly regulated in EVs from 3D versus 2D culture conditions**

| <b>Spalte1</b> | <b>median group 1</b> | <b>median group 2</b> | <b>stdv group 1</b> | <b>stdv group 2</b> | <b>fold change</b> | <b>log(2) fold change</b> | <b>t-Test raw p-Value</b> | <b>t-Test adjusted p-Value</b> |
|----------------|-----------------------|-----------------------|---------------------|---------------------|--------------------|---------------------------|---------------------------|--------------------------------|
| <b>TSPAN14</b> | 66,2                  | 134,35                | 15,79               | 17,03               | 0,49               | -1,02                     | 0,0010822                 | 0,29319                        |
| <b>ADGRG1</b>  | 11,9                  | 171,55                | 27,3                | 38,33               | 0,07               | -3,85                     | 0,0013449                 | 0,29319                        |
| <b>PTGFRN</b>  | 48,75                 | 137,15                | 13,15               | 31,02               | 0,36               | -1,49                     | 0,0046935                 | 0,47446                        |
| <b>EPHA2</b>   | 52,4                  | 146,9                 | 4,1                 | 26,29               | 0,36               | -1,49                     | 0,0055448                 | 0,47446                        |
| <b>CD151</b>   | 48,15                 | 147,25                | 17,95               | 39,14               | 0,33               | -1,61                     | 0,0079419                 | 0,47446                        |
| <b>PGK1</b>    | 129,8                 | 82                    | 18,22               | 8,38                | 1,58               | 0,66                      | 0,0083176                 | 0,47446                        |
| <b>CD46</b>    | 79,4                  | 129,45                | 21,15               | 17,6                | 0,61               | -0,71                     | 0,0096387                 | 0,47446                        |
| <b>ITGA3</b>   | 48,25                 | 151,8                 | 6,93                | 35,51               | 0,32               | -1,65                     | 0,010731                  | 0,47446                        |
| <b>KPNB1</b>   | 82,9                  | 113,05                | 12,28               | 10,8                | 0,73               | -0,45                     | 0,010915                  | 0,47446                        |
| <b>ITGB1</b>   | 57,95                 | 152,25                | 12,26               | 33,39               | 0,38               | -1,39                     | 0,011497                  | 0,47446                        |
| <b>ADAM10</b>  | 85                    | 117,95                | 13,25               | 16,62               | 0,72               | -0,47                     | 0,01197                   | 0,47446                        |
| <b>DLG1</b>    | 57,3                  | 136,55                | 13,95               | 39,74               | 0,42               | -1,25                     | 0,017437                  | 0,60867                        |
| <b>EML2</b>    | 124                   | 86,75                 | 24,08               | 18,62               | 1,43               | 0,52                      | 0,020416                  | 0,60867                        |
| <b>ITGA2</b>   | 44,1                  | 155,95                | 10,68               | 47,96               | 0,28               | -1,82                     | 0,020496                  | 0,60867                        |
| <b>ANXA7</b>   | 76,3                  | 125,35                | 12,07               | 19,29               | 0,61               | -0,72                     | 0,021508                  | 0,60867                        |
| <b>RPL7</b>    | 131,7                 | 62,2                  | 43,47               | 16,28               | 2,12               | 1,08                      | 0,027731                  | 0,60867                        |
| <b>F11R</b>    | 62,8                  | 125,85                | 7,93                | 37,48               | 0,5                | -1                        | 0,028809                  | 0,60867                        |
| <b>ITGB5</b>   | 42,7                  | 134,95                | 19,39               | 47,93               | 0,32               | -1,66                     | 0,030499                  | 0,60867                        |
| <b>LAMP1</b>   | 59,75                 | 120,7                 | 15,69               | 42,41               | 0,5                | -1,01                     | 0,030733                  | 0,60867                        |
| <b>ATP1A1</b>  | 61,65                 | 143,6                 | 6,16                | 37,51               | 0,43               | -1,22                     | 0,030785                  | 0,60867                        |

**Supplementary Table 7. Detailed description of antibodies and TaqMan Advanced microRNA assays**

| <b>Antibodies</b>                      |                 |                           |                 |                    |
|----------------------------------------|-----------------|---------------------------|-----------------|--------------------|
| <b>ID</b>                              | <b>Clone</b>    | <b>Supplier</b>           | <b>Dilution</b> | <b>Application</b> |
| Integrin $\alpha$ 6                    | 3750            | Cell Signaling Technology | 1:800           | WB                 |
| Integrin $\beta$ 1                     | D6S1W           | Cell Signaling Technology | 1:200           | WB                 |
| EPHA-2                                 | D4A2            | Cell Signaling Technology | 1:800           | WB                 |
| GAPDH                                  | G-9             | Santa Cruz                | 1:500           | WB                 |
| E-cadherin                             | C36             | BD Biosciences            | 1:500           | WB                 |
| p120 Catenin                           | H-90            | BD Biosciences            | 1:500           | WB                 |
| $\beta$ -catenin                       | E-5             | Santa Cruz                | 1:100           | WB                 |
| Importin- $\beta$ 1                    | E1F1G           | Cell Signaling Technology | 1:200           | WB                 |
| Tubulin                                | DLN-15303       | Dianova                   | 1:500           | WB                 |
| LAMP1                                  | D4O1S           | Cell Signaling Technology | 1:800           | WB                 |
| JAM-A                                  | 1H2A9           | Santa Cruz                | 1:300           | WB                 |
| Integrin $\alpha$ 3                    | C-18            | Santa Cruz                | 1:400           | WB                 |
| CD151                                  | 17327           | Cell Signaling Technology | 1:500           | WB                 |
| Integrin $\alpha$ 2                    | AF1740          | R&D Systems               | 1:200           | WB                 |
| Ki-67                                  | SP6             | ThermoFisher Scientific   | 1:200           | IHC                |
| E-cadherin                             | 24E10           | Cell Signaling Technology | 1:200           | ICC & IHC          |
| Mucin -1                               |                 | collaborators             |                 | ICC & IHC          |
| CD9                                    | ALB6            | Santa Cruz                | 3:20            | IFC                |
| CD81                                   | 5A6             | Santa Cruz                | 3:20            | IFC                |
| Flotillin-1                            | H-104           | Santa Cruz                | 3:20            | IFC                |
| Cytochrome c                           | 7H8             | Santa Cruz                | 3:20            | IFC                |
| <b>TaqMan Advanced microRNA assays</b> |                 |                           |                 |                    |
| <b>Assay name</b>                      | <b>Assay ID</b> | <b>Supplier</b>           |                 |                    |
| hsa-miR-210-3p                         | 477970_mir      | ThermoFisher Scientific   |                 |                    |
| hsa-miR-27a-3p                         | 478384_mir      | ThermoFisher Scientific   |                 |                    |
| hsa-miR-183-5p                         | 477937_mir      | ThermoFisher Scientific   |                 |                    |
| hsa-miR-375                            | 478074_mir      | ThermoFisher Scientific   |                 |                    |
| hsa-miR-181b-5p                        | 478583_mir      | ThermoFisher Scientific   |                 |                    |
| hsa-miR-483-3p                         | 478122_mir      | ThermoFisher Scientific   |                 |                    |
| hsa-miR-30d-5p                         | 478606_mir      | ThermoFisher Scientific   |                 |                    |
| hsa-miR-152-3p                         | 477921_mir      | ThermoFisher Scientific   |                 |                    |
| hsa-miR-26b-5p                         | 478418_mir      | ThermoFisher Scientific   |                 |                    |
| hsa-miR-155-5p                         | 477927_mir      | ThermoFisher Scientific   |                 |                    |

WB: Western Blotting; IHC: Immunohistochemistry; ICC: Immunocytochemistry; IFC: Imaging Flow Cytometry
